# Supplementary material
Source: PubMed Central journal article supplement (PMC4869619)
Supplement: ez6b00105_si_001.pdf [file ez6b00105_si_001.pdf]

## SUPPORTING INFORMATION

# Partitioning of Viruses in Wastewater Systems and Potential for Aerosolization

*Mari Titcombe Lee, Amy Pruden, Linsey C. Marr\**

Department of Civil and Environmental Engineering, Virginia Tech, 418 Durham Hall,  
Blacksburg, VA 24061, United States

\*Corresponding author phone: (540) 231-6071, fax: (540) 231-7916, e-mail: [lmarr@vt.edu](mailto:lmarr@vt.edu)

This supporting information document contains the following information:

- Comparison of virus properties
- Sludge properties
- Details about containers
- Schematic of virus, sludge, and material combinations.
- Primers and qPCR conditions
- Experimental controls
- Mass balance on virions
- Partitioning of viruses in each fraction by percentage

Number of pages: 6

Number of figures: 2

Number of tables: 5

**Table S1.** Characteristics of Ebola virus and surrogates MS2 and Phi-6.

| virus | genome type | genome size (kb) | enveloped? | capsid structure        | dimensions                              |
|-------|-------------|------------------|------------|-------------------------|-----------------------------------------|
| Ebola | (-)ssRNA    | 19               | yes        | helical (filamentous)   | diameter: 80 nm<br>length: 800-14000 nm |
| MS2   | (+)ssRNA    | 3.5              | no         | icosahedral (spherical) | 27-34 nm                                |
| Phi6  | dsRNA       | 13.5             | yes        | icosahedral (spherical) | 75-85 nm                                |

**Table S2.** Properties of real, anaerobically digested sludge at the wastewater treatment plant when we collected our sample.

| property                  | value                                        |
|---------------------------|----------------------------------------------|
| pH                        | 7.3                                          |
| alkalinity                | 3880 mg L <sup>-1</sup> as CaCO <sub>3</sub> |
| volatile fatty acids      | 33 mg L <sup>-1</sup>                        |
| total suspended solids    | 1.60% <sup>a</sup>                           |
| volatile suspended solids | 1.20% <sup>a</sup>                           |
| temperature               | 35.6 °C                                      |

<sup>a</sup>Differs from the value appearing in the main document, which was for our specific sample.

## Methods

*Description of containers.* We used 140 mL porcelain dishes (Fisher Scientific) that measured 8.1 cm in diameter across the top, 6.0 cm across the bottom, and 4.5 cm tall. We purchased polyvinyl chloride (PVC) pipe caps measuring 6.2 cm in diameter and 4.0 cm tall, with an interior surface area of 108 cm<sup>2</sup>, from a local hardware store. The autoclavable polypropylene jars (McMaster-Carr) had a capacity of 125 mL each and measured 7.0 cm in diameter and 6.0 cm tall. We fabricated concrete bowls from type I/II Portland cement, natural sand (passes #4, 4.76-mm sieve) as the fine aggregate, silica sand (mostly retained on #10, 2-mm sieve) as the coarse aggregate, and water reducer (Sika Plastocrete 161). The bowls measured 9.6 cm in diameter across the top, 7.4 cm across the bottom, and 2.4 cm tall. We allowed the bowls to cure for one month and applied an acrylic sealant (Quikrete 8730-02) before use.

Prior to each experiment, we cleaned all containers with ultrapure water, ethanol, and RNase Away and DNA Away (Thermo Scientific), and we autoclaved the porcelain, concrete and polypropylene bowls. PVC cannot be autoclaved, so we used new PVC pipe caps for each experiment.

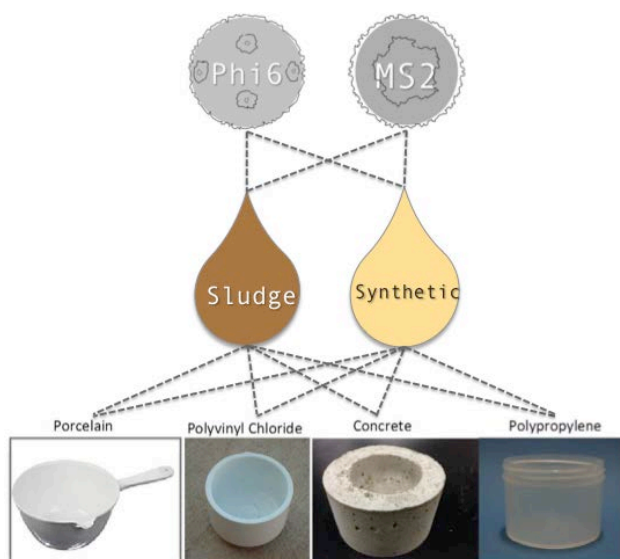

**Figure S1.** Schematic of virus, sludge, and material combinations investigated.

**Table S3.** Primers and probes used in qPCR.<sup>1</sup>

| bacteriophage | purpose        | sequence                        |
|---------------|----------------|---------------------------------|
| MS2           | forward primer | 5'-GTCCATACCTTAGATGCGTTAGC-3'   |
|               | reverse primer | 5'-CCGTTAGCGAAGTTGCTTGG-3'      |
|               | probe          | 5'-ACGTCGCCAGTTCCGCCATTGTTCG-3' |
| Phi6          | forward primer | 5'-TGGCGGCGGTCAAGAGC-3'         |
|               | reverse primer | 5'-GGATGATTCTCCAGAAGCTGCTG-3'   |
|               | probe          | 5'-CGGTCGTCGCAGGTCTGACACTCGC-3' |

**Table S4.** qPCR conditions on a Bio-Rad CFX96 real-time system and C1000 thermal cycler.

| MS2 and Phi6 SYBR green     | MS2 probe                                                                             | Phi6 probe                                                                            |
|-----------------------------|---------------------------------------------------------------------------------------|---------------------------------------------------------------------------------------|
| hold at 94 °C for 3 min     | hold at 94 °C for 3 min                                                               | hold at 94 °C for 3 min                                                               |
| 40 cycles at 94 °C for 15 s | 35 cycles at 94 °C for 15 s                                                           | 40 cycles at 94 °C for 15 s                                                           |
| hold at 60 °C for 1 min     | hold at 60 °C for 1 min                                                               | hold at 60 °C for 1 min                                                               |
| N/A                         | final melt ramp from 65 °C to 95 °C with a 5-s hold at 65 °C and 0.5 °C/5 s ramp rate | final melt ramp from 65 °C to 95 °C with a 5-s hold at 65 °C and 0.5 °C/5 s ramp rate |

*Negative controls.* We investigated the potential for RNA and DNA contamination from containers by mimicking the sampling procedure (sample volume, swabbing, contact time, etc.) using autoclaved, ultrapure water as a sample blank, in clean/autoclaved containers. We analyzed

sample blanks by RNA extraction, cDNA synthesis, and qPCR analysis as previously detailed. There was no amplification in the sample blanks after 35 PCR cycles.

We investigated the potential for RNA and DNA contamination from all stock solutions, working fluids, and bacterial and viral stocks, individually, using the previously described RNA extraction and cDNA conversion methods. We sequenced the samples to verify specificity of primers and probes for each bacteriophage. We amplified the converted cDNA samples using the previously specified qPCR reaction mixtures and volumes (intercalating dye or probe-based method), with a modified PCR machine protocol that omitted the final melt curve temperature ramp. We immediately removed amplified products from the PCR machine and further processed them or stored them at 4 °C for no more than 2 h before further processing. We analyzed aliquots of amplified PCR products by gel electrophoresis to verify base pair length and check for DNA carry over. We measured DNA concentration (Qubit fluorometer (Invitogen)) to determine volume of amplification product required for Sanger sequencing. We then cleaned amplified products by enzymatic treatment in sterile, optically clear vials, using Affymetrix ExoSAP-IT®, and incubated according to product recommendations on a Bio-Rad thermocycler. We submitted enzymatically cleaned, amplified samples, and primer and probe aliquots, to the Virginia Tech Biocomplexity Institute Genomics Research Institute for Sanger sequencing. We evaluated resulting chromatographs using 4Peak ABI chromatogram freeware and identified DNA sequences by NCBI Nucleotide BLAST. Detectable background concentrations of bacteriophages in working fluids and bacterial stock solutions were at least four orders of magnitude below experimental sample concentrations.

## Results

**Table S5.** Number of virions (median PFU equivalents measured by qPCR) recovered from each fraction (liquid, solids, surface) and total across all fractions for each combination of virus, sludge, and material surface. In each case, the amount seeded into the sludge was  $10^8$  PFU.

|                                 | <b>porcelain</b>   | <b>concrete</b>    | <b>PVC</b>         | <b>polypropylene</b> |
|---------------------------------|--------------------|--------------------|--------------------|----------------------|
| <i>MS2 in synthetic sludge</i>  |                    |                    |                    |                      |
| liquid                          | $1 \times 10^9$    | $8 \times 10^8$    | $7 \times 10^8$    | $9 \times 10^8$      |
| solids                          | $6 \times 10^6$    | $1 \times 10^7$    | $1 \times 10^7$    | $7 \times 10^6$      |
| surface                         | $3 \times 10^6$    | $6 \times 10^6$    | $3 \times 10^6$    | $3 \times 10^6$      |
| total                           | $1 \times 10^9$    | $8 \times 10^8$    | $7 \times 10^8$    | $9 \times 10^8$      |
| <i>Phi6 in synthetic sludge</i> |                    |                    |                    |                      |
| liquid                          | $2 \times 10^9$    | $6 \times 10^9$    | $1 \times 10^9$    | $6 \times 10^8$      |
| solids                          | $4 \times 10^7$    | $9 \times 10^7$    | $5 \times 10^7$    | $2 \times 10^7$      |
| surface                         | $9 \times 10^7$    | $9 \times 10^6$    | $1 \times 10^6$    | $1 \times 10^6$      |
| total                           | $3 \times 10^9$    | $6 \times 10^9$    | $1 \times 10^9$    | $6 \times 10^8$      |
| <i>MS2 in real sludge</i>       |                    |                    |                    |                      |
| liquid                          | $4 \times 10^8$    | $2 \times 10^8$    | $5 \times 10^9$    | $2 \times 10^8$      |
| solids                          | $2 \times 10^5$    | $2 \times 10^5$    | $4 \times 10^5$    | $1 \times 10^4$      |
| surface                         | $4 \times 10^6$    | $2 \times 10^4$    | $8 \times 10^6$    | $1 \times 10^7$      |
| total                           | $4 \times 10^8$    | $2 \times 10^8$    | $5 \times 10^9$    | $2 \times 10^8$      |
| <i>Phi6 in real sludge</i>      |                    |                    |                    |                      |
| liquid                          | $4 \times 10^{10}$ | $2 \times 10^{10}$ | $7 \times 10^{11}$ | $3 \times 10^{11}$   |
| solids                          | $1 \times 10^7$    | $1 \times 10^8$    | $1 \times 10^6$    | $3 \times 10^6$      |
| surface                         | $1 \times 10^7$    | $4 \times 10^8$    | $4 \times 10^8$    | $6 \times 10^9$      |
| total                           | $4 \times 10^{10}$ | $2 \times 10^{10}$ | $7 \times 10^{11}$ | $3 \times 10^{11}$   |

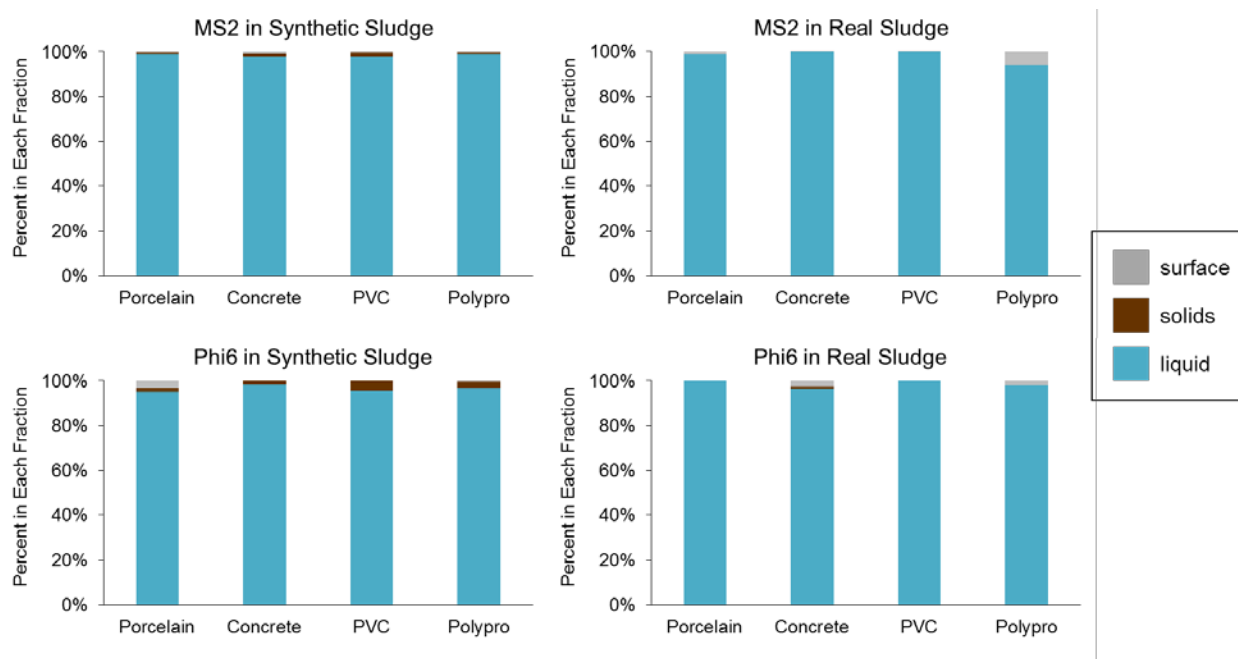

**Figure S2.** Partitioning of MS2 and Phi6 in synthetic sludge and anaerobically digested sludge between liquid, wetted solids, and material surface of porcelain, concrete, PVC, and polypropylene (polypro), in terms of percent of total virus recovered, based on median concentrations in each fraction.

## References

1. Gendron, L.; Verreault, D.; Veillette, M.; Moineau, S.; Duchaine, C., Evaluation of Filters for the Sampling and Quantification of RNA Phage Aerosols. *Aerosol Sci. Technol.* **2010**, *44*, 893-901.
